# Supplementary material
Source: publisher figshare collection journal article supplement (https://acs.figshare.com/ndownloader/files/4748662)
Supplement: Supplementary file 1 [file 4748662]

  
data_150212b 
  
_audit_creation_method            SHELXL-97 
_chemical_name_systematic 
; 
 ? 
; 
_chemical_name_common             ? 
_chemical_melting_point           ? 
_chemical_formula_moiety          ? 
_chemical_formula_sum 
 'C22 H33 N4 O P' 
_chemical_formula_weight          400.49 
  
loop_ 
 _atom_type_symbol 
 _atom_type_description 
 _atom_type_scat_dispersion_real 
 _atom_type_scat_dispersion_imag 
 _atom_type_scat_source 
 'C'  'C'   0.0033   0.0016 
 'International Tables Vol C Tables 4.2.6.8 and 6.1.1.4' 
 'H'  'H'   0.0000   0.0000 
 'International Tables Vol C Tables 4.2.6.8 and 6.1.1.4' 
 'N'  'N'   0.0061   0.0033 
 'International Tables Vol C Tables 4.2.6.8 and 6.1.1.4' 
 'O'  'O'   0.0106   0.0060 
 'International Tables Vol C Tables 4.2.6.8 and 6.1.1.4' 
 'P'  'P'   0.1023   0.0942 
 'International Tables Vol C Tables 4.2.6.8 and 6.1.1.4' 
  
_symmetry_cell_setting            Orthorhombic 
_symmetry_space_group_name_H-M    P2(1)2(1)2(1) 
  
loop_ 
 _symmetry_equiv_pos_as_xyz 
 'x, y, z' 
 '-x+1/2, -y, z+1/2' 
 '-x, y+1/2, -z+1/2' 
 'x+1/2, -y+1/2, -z' 
  
_cell_length_a                    12.8626(11) 
_cell_length_b                    17.9115(16) 
_cell_length_c                    20.6589(19) 
_cell_angle_alpha                 90.00 
_cell_angle_beta                  90.00 
_cell_angle_gamma                 90.00 
_cell_volume                      4759.6(7) 
_cell_formula_units_Z             8 
_cell_measurement_temperature     298(2) 
_cell_measurement_reflns_used     2825 
_cell_measurement_theta_min       2.479 
_cell_measurement_theta_max       26.248 
  
_exptl_crystal_description        block 
_exptl_crystal_colour             white 
_exptl_crystal_size_max           0.22 
_exptl_crystal_size_mid           0.12 
_exptl_crystal_size_min           0.10 
_exptl_crystal_density_meas       ? 
_exptl_crystal_density_diffrn     1.118 
_exptl_crystal_density_method     'not measured' 
_exptl_crystal_F_000              1728 
_exptl_absorpt_coefficient_mu     0.134 
_exptl_absorpt_correction_type    multi-scan 
_exptl_absorpt_correction_T_min   0.9712 
_exptl_absorpt_correction_T_max   0.9868 
_exptl_absorpt_process_details    sadabs 
  
_exptl_special_details 
; 
 ? 
; 
  
_diffrn_ambient_temperature       298(2) 
_diffrn_radiation_wavelength      0.71073 
_diffrn_radiation_type            MoK\a 
_diffrn_radiation_source          'fine-focus sealed tube' 
_diffrn_radiation_monochromator   graphite 
_diffrn_measurement_device_type   'CCD area detector' 
_diffrn_measurement_method        'phi and omega scans' 
_diffrn_detector_area_resol_mean  ? 
_diffrn_standards_number          ? 
_diffrn_standards_interval_count  ? 
_diffrn_standards_interval_time   ? 
_diffrn_standards_decay_%         ? 
_diffrn_reflns_number             23893 
_diffrn_reflns_av_R_equivalents   0.0805 
_diffrn_reflns_av_sigmaI/netI     0.1161 
_diffrn_reflns_limit_h_min        -15 
_diffrn_reflns_limit_h_max        11 
_diffrn_reflns_limit_k_min        -21 
_diffrn_reflns_limit_k_max        21 
_diffrn_reflns_limit_l_min        -24 
_diffrn_reflns_limit_l_max        24 
_diffrn_reflns_theta_min          2.27 
_diffrn_reflns_theta_max          25.02 
_reflns_number_total              8368 
_reflns_number_gt                 3718 
_reflns_threshold_expression      >2sigma(I) 
  
_computing_data_collection        'Bruker SMART' 
_computing_cell_refinement        'Bruker SMART' 
_computing_data_reduction         'Bruker SHELXTL' 
_computing_structure_solution     'SHELXS-97 (Sheldrick, 1990)' 
_computing_structure_refinement   'SHELXL-97 (Sheldrick, 1997)' 
_computing_molecular_graphics     'Bruker SHELXTL' 
_computing_publication_material   'Bruker SHELXTL' 
  
_refine_special_details 
; 
 Refinement of F^2^ against ALL reflections.  The weighted R-factor wR and 
 goodness of fit S are based on F^2^, conventional R-factors R are based 
 on F, with F set to zero for negative F^2^. The threshold expression of 
 F^2^ > 2sigma(F^2^) is used only for calculating R-factors(gt) etc. and is 
 not relevant to the choice of reflections for refinement.  R-factors based 
 on F^2^ are statistically about twice as large as those based on F, and R- 
 factors based on ALL data will be even larger. 
; 
  
_refine_ls_structure_factor_coef  Fsqd 
_refine_ls_matrix_type            full 
_refine_ls_weighting_scheme       calc 
_refine_ls_weighting_details 
 'calc w=1/[\s^2^(Fo^2^)+(0.0004P)^2^+0.0000P] where P=(Fo^2^+2Fc^2^)/3' 
_atom_sites_solution_primary      direct 
_atom_sites_solution_secondary    difmap 
_atom_sites_solution_hydrogens    geom 
_refine_ls_hydrogen_treatment     constr 
_refine_ls_extinction_method      none 
_refine_ls_extinction_coef        ? 
_refine_ls_abs_structure_details 
 'Flack H D (1983), Acta Cryst. A39, 876-881' 
_refine_ls_abs_structure_Flack    -0.09(9) 
_refine_ls_number_reflns          8368 
_refine_ls_number_parameters      513 
_refine_ls_number_restraints      0 
_refine_ls_R_factor_all           0.1377 
_refine_ls_R_factor_gt            0.0499 
_refine_ls_wR_factor_ref          0.0767 
_refine_ls_wR_factor_gt           0.0690 
_refine_ls_goodness_of_fit_ref    1.035 
_refine_ls_restrained_S_all       1.035 
_refine_ls_shift/su_max           0.001 
_refine_ls_shift/su_mean          0.000 
  
loop_ 
 _atom_site_label 
 _atom_site_type_symbol 
 _atom_site_fract_x 
 _atom_site_fract_y 
 _atom_site_fract_z 
 _atom_site_U_iso_or_equiv 
 _atom_site_adp_type 
 _atom_site_occupancy 
 _atom_site_symmetry_multiplicity 
 _atom_site_calc_flag 
 _atom_site_refinement_flags 
 _atom_site_disorder_assembly 
 _atom_site_disorder_group 
P1 P 0.09360(10) 0.52626(7) 0.32814(5) 0.0521(3) Uani 1 1 d . . . 
P2 P 0.83930(10) 0.45878(7) 0.48266(6) 0.0628(4) Uani 1 1 d . . . 
N1 N 0.1312(3) 0.60338(19) 0.29158(15) 0.0590(10) Uani 1 1 d . . . 
N2 N 0.1829(2) 0.47330(18) 0.29276(13) 0.0547(9) Uani 1 1 d . . . 
N3 N 0.1172(2) 0.52532(16) 0.40663(12) 0.0553(9) Uani 1 1 d . . . 
H3 H 0.0647 0.5244 0.4323 0.066 Uiso 1 1 calc R . . 
N4 N 0.4424(4) 0.4266(3) 0.4806(3) 0.152(2) Uani 1 1 d . . . 
N5 N 0.7699(3) 0.5104(2) 0.53150(16) 0.0695(11) Uani 1 1 d . . . 
N6 N 0.7866(2) 0.37870(18) 0.50668(16) 0.0623(10) Uani 1 1 d . . . 
N7 N 0.8101(3) 0.4712(2) 0.40623(15) 0.0769(11) Uani 1 1 d . . . 
H7 H 0.8599 0.4849 0.3811 0.092 Uiso 1 1 calc R . . 
N8 N 0.5468(6) 0.3447(4) 0.2799(4) 0.228(4) Uani 1 1 d . . . 
O1 O -0.01729(19) 0.50683(13) 0.32000(11) 0.0620(8) Uani 1 1 d . . . 
O2 O 0.9534(2) 0.47040(15) 0.48817(11) 0.0693(8) Uani 1 1 d . . . 
C1 C 0.2224(3) 0.5108(2) 0.23414(19) 0.0632(13) Uani 1 1 d . . . 
H1 H 0.1700 0.5053 0.2001 0.076 Uiso 1 1 calc R . . 
C2 C 0.2251(3) 0.5924(2) 0.25402(18) 0.0608(13) Uani 1 1 d . . . 
H2 H 0.2844 0.5991 0.2832 0.073 Uiso 1 1 calc R . . 
C3 C 0.2432(4) 0.6417(2) 0.1949(2) 0.0857(15) Uani 1 1 d . . . 
H3A H 0.1872 0.6351 0.1640 0.103 Uiso 1 1 calc R . . 
H3B H 0.2452 0.6938 0.2077 0.103 Uiso 1 1 calc R . . 
C4 C 0.3465(4) 0.6191(3) 0.1646(2) 0.1026(18) Uani 1 1 d . . . 
H4A H 0.3568 0.6475 0.1251 0.123 Uiso 1 1 calc R . . 
H4B H 0.4024 0.6318 0.1941 0.123 Uiso 1 1 calc R . . 
C5 C 0.3525(4) 0.5364(3) 0.1489(2) 0.1042(18) Uani 1 1 d . . . 
H5A H 0.4222 0.5246 0.1342 0.125 Uiso 1 1 calc R . . 
H5B H 0.3048 0.5254 0.1138 0.125 Uiso 1 1 calc R . . 
C6 C 0.3260(4) 0.4871(2) 0.2065(2) 0.0878(15) Uani 1 1 d . . . 
H6A H 0.3227 0.4353 0.1929 0.105 Uiso 1 1 calc R . . 
H6B H 0.3796 0.4916 0.2393 0.105 Uiso 1 1 calc R . . 
C7 C 0.1004(4) 0.6802(2) 0.3097(2) 0.0732(13) Uani 1 1 d . . . 
H7A H 0.0948 0.7089 0.2694 0.088 Uiso 1 1 calc R . . 
C8 C 0.1833(4) 0.7185(2) 0.35123(19) 0.0988(17) Uani 1 1 d . . . 
H8A H 0.1892 0.6929 0.3919 0.148 Uiso 1 1 calc R . . 
H8B H 0.1637 0.7695 0.3587 0.148 Uiso 1 1 calc R . . 
H8C H 0.2489 0.7170 0.3291 0.148 Uiso 1 1 calc R . . 
C9 C -0.0058(4) 0.6822(2) 0.3417(2) 0.1068(18) Uani 1 1 d . . . 
H9A H -0.0568 0.6624 0.3125 0.160 Uiso 1 1 calc R . . 
H9B H -0.0233 0.7328 0.3523 0.160 Uiso 1 1 calc R . . 
H9C H -0.0043 0.6527 0.3804 0.160 Uiso 1 1 calc R . . 
C10 C 0.1654(4) 0.3912(3) 0.2948(2) 0.0826(15) Uani 1 1 d . . . 
H10 H 0.1212 0.3818 0.3326 0.099 Uiso 1 1 calc R . . 
C11 C 0.1030(4) 0.3645(2) 0.2351(2) 0.120(2) Uani 1 1 d . . . 
H11A H 0.0412 0.3941 0.2307 0.179 Uiso 1 1 calc R . . 
H11B H 0.0842 0.3130 0.2406 0.179 Uiso 1 1 calc R . . 
H11C H 0.1449 0.3698 0.1969 0.179 Uiso 1 1 calc R . . 
C12 C 0.2642(4) 0.3467(3) 0.3056(2) 0.119(2) Uani 1 1 d . . . 
H12A H 0.3078 0.3505 0.2680 0.178 Uiso 1 1 calc R . . 
H12B H 0.2469 0.2953 0.3131 0.178 Uiso 1 1 calc R . . 
H12C H 0.3005 0.3662 0.3425 0.178 Uiso 1 1 calc R . . 
C13 C 0.2196(3) 0.5260(3) 0.43550(17) 0.0590(12) Uani 1 1 d . . . 
H13 H 0.2694 0.5364 0.4008 0.071 Uiso 1 1 calc R . . 
C14 C 0.2329(4) 0.5868(2) 0.4865(2) 0.0631(13) Uani 1 1 d . . . 
C15 C 0.3279(4) 0.6197(3) 0.4971(2) 0.0929(17) Uani 1 1 d . . . 
H15 H 0.3849 0.6038 0.4731 0.111 Uiso 1 1 calc R . . 
C16 C 0.3411(5) 0.6756(3) 0.5421(3) 0.118(2) Uani 1 1 d . . . 
H16 H 0.4057 0.6982 0.5471 0.142 Uiso 1 1 calc R . . 
C17 C 0.2595(6) 0.6976(3) 0.5792(3) 0.106(2) Uani 1 1 d . . . 
H17 H 0.2686 0.7343 0.6105 0.128 Uiso 1 1 calc R . . 
C18 C 0.1644(5) 0.6659(3) 0.5705(2) 0.0972(17) Uani 1 1 d . . . 
H18 H 0.1082 0.6816 0.5954 0.117 Uiso 1 1 calc R . . 
C19 C 0.1508(4) 0.6093(2) 0.5241(2) 0.0759(14) Uani 1 1 d . . . 
H19 H 0.0860 0.5871 0.5189 0.091 Uiso 1 1 calc R . . 
C20 C 0.1835(4) 0.3981(2) 0.4801(2) 0.0892(16) Uani 1 1 d . . . 
H20A H 0.2080 0.3540 0.4983 0.107 Uiso 1 1 calc R . . 
H20B H 0.1126 0.4048 0.4735 0.107 Uiso 1 1 calc R . . 
C21 C 0.2480(4) 0.4502(3) 0.4640(2) 0.0634(13) Uani 1 1 d . . . 
C22 C 0.3547(5) 0.4378(3) 0.4749(3) 0.0954(19) Uani 1 1 d . . . 
C23 C 0.7316(3) 0.3894(3) 0.5683(2) 0.0684(13) Uani 1 1 d . . . 
H23 H 0.7827 0.3882 0.6034 0.082 Uiso 1 1 calc R . . 
C24 C 0.6875(3) 0.4678(3) 0.56378(18) 0.0691(13) Uani 1 1 d . . . 
H24 H 0.6269 0.4665 0.5350 0.083 Uiso 1 1 calc R . . 
C25 C 0.6511(4) 0.4920(3) 0.6303(2) 0.0995(17) Uani 1 1 d . . . 
H25A H 0.6236 0.5424 0.6285 0.119 Uiso 1 1 calc R . . 
H25B H 0.7087 0.4911 0.6605 0.119 Uiso 1 1 calc R . . 
C26 C 0.5655(4) 0.4369(4) 0.6522(2) 0.117(2) Uani 1 1 d . . . 
H26A H 0.5463 0.4483 0.6965 0.141 Uiso 1 1 calc R . . 
H26B H 0.5044 0.4441 0.6254 0.141 Uiso 1 1 calc R . . 
C27 C 0.5983(5) 0.3573(3) 0.6483(2) 0.115(2) Uani 1 1 d . . . 
H27A H 0.5382 0.3260 0.6564 0.138 Uiso 1 1 calc R . . 
H27B H 0.6484 0.3477 0.6824 0.138 Uiso 1 1 calc R . . 
C28 C 0.6459(4) 0.3348(3) 0.5841(2) 0.0892(15) Uani 1 1 d . . . 
H28A H 0.6739 0.2846 0.5870 0.107 Uiso 1 1 calc R . . 
H28B H 0.5935 0.3356 0.5504 0.107 Uiso 1 1 calc R . . 
C29 C 0.7724(5) 0.5923(3) 0.5281(3) 0.109(2) Uani 1 1 d . . . 
H29 H 0.8107 0.6002 0.4876 0.131 Uiso 1 1 calc R . . 
C30 C 0.6675(4) 0.6269(2) 0.5114(3) 0.124(2) Uani 1 1 d . . . 
H30A H 0.6201 0.6194 0.5467 0.186 Uiso 1 1 calc R . . 
H30B H 0.6403 0.6037 0.4731 0.186 Uiso 1 1 calc R . . 
H30C H 0.6761 0.6794 0.5039 0.186 Uiso 1 1 calc R . . 
C31 C 0.8384(5) 0.6271(3) 0.5729(3) 0.175(3) Uani 1 1 d . . . 
H31A H 0.8058 0.6274 0.6148 0.263 Uiso 1 1 calc R . . 
H31B H 0.8517 0.6775 0.5595 0.263 Uiso 1 1 calc R . . 
H31C H 0.9028 0.6002 0.5753 0.263 Uiso 1 1 calc R . . 
C32 C 0.8456(4) 0.3063(3) 0.5014(3) 0.0961(17) Uani 1 1 d . . . 
H32 H 0.7935 0.2682 0.5117 0.115 Uiso 1 1 calc R . . 
C33 C 0.8775(5) 0.2880(3) 0.4380(2) 0.151(3) Uani 1 1 d . . . 
H33A H 0.9198 0.3276 0.4209 0.226 Uiso 1 1 calc R . . 
H33B H 0.8175 0.2814 0.4110 0.226 Uiso 1 1 calc R . . 
H33C H 0.9171 0.2426 0.4388 0.226 Uiso 1 1 calc R . . 
C34 C 0.9296(4) 0.2945(3) 0.5523(2) 0.1129(19) Uani 1 1 d . . . 
H34A H 0.9597 0.2458 0.5469 0.169 Uiso 1 1 calc R . . 
H34B H 0.8994 0.2983 0.5946 0.169 Uiso 1 1 calc R . . 
H34C H 0.9825 0.3318 0.5473 0.169 Uiso 1 1 calc R . . 
C35 C 0.7081(4) 0.4613(3) 0.3764(2) 0.0811(15) Uani 1 1 d . . . 
H35 H 0.6605 0.4416 0.4092 0.097 Uiso 1 1 calc R . . 
C36 C 0.6633(5) 0.5321(3) 0.3508(2) 0.0760(15) Uani 1 1 d . . . 
C37 C 0.7229(4) 0.5814(3) 0.3137(3) 0.1005(19) Uani 1 1 d . . . 
H37 H 0.7916 0.5697 0.3041 0.121 Uiso 1 1 calc R . . 
C38 C 0.6815(6) 0.6464(4) 0.2914(3) 0.115(2) Uani 1 1 d . . . 
H38 H 0.7237 0.6794 0.2686 0.138 Uiso 1 1 calc R . . 
C39 C 0.5796(6) 0.6644(4) 0.3016(3) 0.123(2) Uani 1 1 d . . . 
H39 H 0.5521 0.7085 0.2852 0.147 Uiso 1 1 calc R . . 
C40 C 0.5186(5) 0.6161(4) 0.3365(3) 0.126(2) Uani 1 1 d . . . 
H40 H 0.4489 0.6271 0.3438 0.151 Uiso 1 1 calc R . . 
C41 C 0.5611(5) 0.5512(4) 0.3608(3) 0.111(2) Uani 1 1 d . . . 
H41 H 0.5191 0.5193 0.3848 0.133 Uiso 1 1 calc R . . 
C42 C 0.7972(5) 0.3835(3) 0.2861(3) 0.121(2) Uani 1 1 d . . . 
H42A H 0.7905 0.3497 0.2522 0.146 Uiso 1 1 calc R . . 
H42B H 0.8622 0.4030 0.2963 0.146 Uiso 1 1 calc R . . 
C43 C 0.7147(5) 0.4036(3) 0.3198(3) 0.0960(19) Uani 1 1 d . . . 
C44 C 0.6202(6) 0.3718(4) 0.3015(4) 0.151(3) Uani 1 1 d . . . 
  
loop_ 
 _atom_site_aniso_label 
 _atom_site_aniso_U_11 
 _atom_site_aniso_U_22 
 _atom_site_aniso_U_33 
 _atom_site_aniso_U_23 
 _atom_site_aniso_U_13 
 _atom_site_aniso_U_12 
P1 0.0509(8) 0.0650(8) 0.0405(6) -0.0012(7) -0.0018(7) -0.0025(7) 
P2 0.0535(9) 0.0813(10) 0.0536(8) -0.0002(8) 0.0074(7) -0.0023(8) 
N1 0.064(3) 0.059(3) 0.054(2) -0.003(2) 0.006(2) 0.000(2) 
N2 0.062(2) 0.054(2) 0.0479(19) -0.0078(19) 0.0037(19) -0.004(2) 
N3 0.045(2) 0.080(2) 0.0411(18) -0.0055(18) -0.0025(18) -0.005(2) 
N4 0.092(4) 0.163(5) 0.200(6) 0.035(4) -0.036(5) 0.012(4) 
N5 0.066(3) 0.064(3) 0.078(3) -0.004(2) 0.016(2) 0.000(2) 
N6 0.056(2) 0.068(3) 0.062(3) -0.004(2) 0.009(2) -0.001(2) 
N7 0.052(3) 0.116(3) 0.062(2) 0.015(2) -0.001(2) -0.008(2) 
N8 0.158(7) 0.231(7) 0.294(9) -0.091(6) -0.043(6) -0.040(6) 
O1 0.0461(18) 0.093(2) 0.0468(16) 0.0027(15) -0.0050(15) -0.0104(16) 
O2 0.0477(18) 0.106(2) 0.0540(17) 0.0013(17) 0.0029(16) -0.0073(19) 
C1 0.064(3) 0.081(4) 0.044(3) -0.009(2) 0.011(3) -0.006(3) 
C2 0.064(3) 0.075(4) 0.043(3) 0.000(3) 0.005(3) -0.015(3) 
C3 0.097(4) 0.098(4) 0.062(3) 0.007(3) 0.008(3) -0.020(3) 
C4 0.109(5) 0.131(5) 0.068(4) 0.010(3) 0.029(4) -0.033(4) 
C5 0.105(4) 0.133(5) 0.074(4) -0.006(4) 0.035(3) -0.018(4) 
C6 0.095(4) 0.099(4) 0.069(3) -0.016(3) 0.026(3) -0.007(4) 
C7 0.093(4) 0.068(4) 0.058(3) 0.005(2) 0.002(3) 0.001(3) 
C8 0.139(5) 0.072(3) 0.085(4) -0.014(3) -0.011(4) -0.002(4) 
C9 0.115(5) 0.095(4) 0.111(5) -0.002(3) 0.022(4) 0.034(3) 
C10 0.100(4) 0.074(4) 0.075(3) -0.015(3) 0.021(4) -0.011(4) 
C11 0.142(5) 0.106(4) 0.110(4) -0.044(3) 0.014(4) -0.031(4) 
C12 0.144(5) 0.088(4) 0.124(5) 0.005(3) 0.028(4) 0.037(4) 
C13 0.044(3) 0.088(4) 0.045(2) -0.002(3) 0.000(2) 0.001(3) 
C14 0.065(4) 0.075(3) 0.049(3) -0.002(3) -0.017(3) -0.009(3) 
C15 0.079(4) 0.111(5) 0.089(4) -0.019(3) -0.020(4) -0.013(4) 
C16 0.113(6) 0.121(5) 0.120(6) -0.027(4) -0.046(5) -0.036(5) 
C17 0.137(7) 0.095(5) 0.088(5) -0.020(4) -0.037(5) -0.001(5) 
C18 0.124(6) 0.093(4) 0.075(4) -0.010(3) -0.013(4) 0.008(4) 
C19 0.085(4) 0.083(4) 0.059(3) -0.011(3) -0.012(3) -0.003(3) 
C20 0.083(4) 0.092(4) 0.092(4) 0.007(3) 0.003(4) 0.016(3) 
C21 0.054(4) 0.078(4) 0.058(3) -0.003(3) -0.003(3) 0.003(3) 
C22 0.070(4) 0.119(5) 0.097(4) 0.010(3) -0.017(4) 0.010(4) 
C23 0.056(3) 0.090(4) 0.059(3) 0.008(3) 0.007(3) -0.005(3) 
C24 0.060(3) 0.091(4) 0.056(3) -0.002(3) 0.016(3) -0.001(3) 
C25 0.098(4) 0.130(5) 0.071(3) -0.009(3) 0.025(3) 0.005(4) 
C26 0.099(5) 0.183(6) 0.069(4) -0.003(4) 0.040(3) -0.005(5) 
C27 0.097(5) 0.158(6) 0.090(5) 0.026(4) 0.028(4) -0.027(5) 
C28 0.078(4) 0.111(4) 0.079(4) 0.023(3) 0.006(3) -0.017(3) 
C29 0.104(5) 0.094(5) 0.128(5) -0.011(4) -0.004(5) 0.006(4) 
C30 0.143(5) 0.096(4) 0.133(5) -0.006(4) -0.015(5) 0.029(4) 
C31 0.141(6) 0.129(5) 0.257(9) -0.082(5) -0.028(6) -0.009(5) 
C32 0.096(4) 0.093(4) 0.099(5) -0.021(3) 0.007(4) 0.012(4) 
C33 0.184(7) 0.146(5) 0.123(5) -0.028(4) -0.015(5) 0.063(5) 
C34 0.107(5) 0.110(4) 0.121(4) 0.022(3) -0.017(4) 0.029(4) 
C35 0.057(4) 0.112(5) 0.074(3) 0.016(4) -0.007(3) -0.016(3) 
C36 0.050(4) 0.111(5) 0.067(3) -0.001(3) -0.009(3) -0.002(4) 
C37 0.084(5) 0.108(5) 0.109(5) 0.019(4) 0.008(4) 0.015(4) 
C38 0.095(6) 0.131(6) 0.119(5) 0.022(4) 0.001(5) 0.012(5) 
C39 0.112(7) 0.123(6) 0.133(6) 0.000(5) -0.029(5) 0.025(5) 
C40 0.083(5) 0.163(7) 0.131(6) -0.003(5) -0.014(5) 0.033(5) 
C41 0.080(5) 0.143(6) 0.110(5) 0.018(4) -0.008(4) 0.003(4) 
C42 0.116(6) 0.111(5) 0.137(6) -0.006(4) 0.005(5) -0.022(4) 
C43 0.075(5) 0.091(4) 0.123(6) -0.002(4) -0.036(4) -0.011(4) 
C44 0.109(7) 0.147(7) 0.197(8) -0.034(5) -0.037(6) -0.021(5) 
  
_geom_special_details 
; 
 All esds (except the esd in the dihedral angle between two l.s. planes) 
 are estimated using the full covariance matrix.  The cell esds are taken 
 into account individually in the estimation of esds in distances, angles 
 and torsion angles; correlations between esds in cell parameters are only 
 used when they are defined by crystal symmetry.  An approximate (isotropic) 
 treatment of cell esds is used for estimating esds involving l.s. planes. 
; 
  
loop_ 
 _geom_bond_atom_site_label_1 
 _geom_bond_atom_site_label_2 
 _geom_bond_distance 
 _geom_bond_site_symmetry_2 
 _geom_bond_publ_flag 
P1 O1 1.478(3) . ? 
P1 N1 1.647(3) . ? 
P1 N3 1.650(3) . ? 
P1 N2 1.659(3) . ? 
P2 O2 1.486(2) . ? 
P2 N5 1.634(3) . ? 
P2 N7 1.638(3) . ? 
P2 N6 1.662(3) . ? 
N1 C2 1.449(4) . ? 
N1 C7 1.481(4) . ? 
N2 C1 1.475(4) . ? 
N2 C10 1.488(5) . ? 
N3 C13 1.445(4) . ? 
N3 H3 0.8600 . ? 
N4 C22 1.152(5) . ? 
N5 C24 1.467(5) . ? 
N5 C29 1.470(6) . ? 
N6 C23 1.468(4) . ? 
N6 C32 1.507(5) . ? 
N7 C35 1.460(5) . ? 
N7 H7 0.8600 . ? 
N8 C44 1.152(7) . ? 
C1 C6 1.510(5) . ? 
C1 C2 1.518(5) . ? 
C1 H1 0.9800 . ? 
C2 C3 1.525(5) . ? 
C2 H2 0.9800 . ? 
C3 C4 1.525(6) . ? 
C3 H3A 0.9700 . ? 
C3 H3B 0.9700 . ? 
C4 C5 1.518(6) . ? 
C4 H4A 0.9700 . ? 
C4 H4B 0.9700 . ? 
C5 C6 1.520(5) . ? 
C5 H5A 0.9700 . ? 
C5 H5B 0.9700 . ? 
C6 H6A 0.9700 . ? 
C6 H6B 0.9700 . ? 
C7 C9 1.517(5) . ? 
C7 C8 1.531(5) . ? 
C7 H7A 0.9800 . ? 
C8 H8A 0.9600 . ? 
C8 H8B 0.9600 . ? 
C8 H8C 0.9600 . ? 
C9 H9A 0.9600 . ? 
C9 H9B 0.9600 . ? 
C9 H9C 0.9600 . ? 
C10 C12 1.516(6) . ? 
C10 C11 1.548(5) . ? 
C10 H10 0.9800 . ? 
C11 H11A 0.9600 . ? 
C11 H11B 0.9600 . ? 
C11 H11C 0.9600 . ? 
C12 H12A 0.9600 . ? 
C12 H12B 0.9600 . ? 
C12 H12C 0.9600 . ? 
C13 C21 1.525(5) . ? 
C13 C14 1.525(5) . ? 
C13 H13 0.9800 . ? 
C14 C19 1.372(5) . ? 
C14 C15 1.374(5) . ? 
C15 C16 1.376(6) . ? 
C15 H15 0.9300 . ? 
C16 C17 1.358(7) . ? 
C16 H16 0.9300 . ? 
C17 C18 1.361(7) . ? 
C17 H17 0.9300 . ? 
C18 C19 1.405(5) . ? 
C18 H18 0.9300 . ? 
C19 H19 0.9300 . ? 
C20 C21 1.291(5) . ? 
C20 H20A 0.9300 . ? 
C20 H20B 0.9300 . ? 
C21 C22 1.408(6) . ? 
C23 C28 1.509(5) . ? 
C23 C24 1.518(5) . ? 
C23 H23 0.9800 . ? 
C24 C25 1.514(5) . ? 
C24 H24 0.9800 . ? 
C25 C26 1.546(6) . ? 
C25 H25A 0.9700 . ? 
C25 H25B 0.9700 . ? 
C26 C27 1.489(6) . ? 
C26 H26A 0.9700 . ? 
C26 H26B 0.9700 . ? 
C27 C28 1.515(6) . ? 
C27 H27A 0.9700 . ? 
C27 H27B 0.9700 . ? 
C28 H28A 0.9700 . ? 
C28 H28B 0.9700 . ? 
C29 C31 1.403(6) . ? 
C29 C30 1.523(6) . ? 
C29 H29 0.9800 . ? 
C30 H30A 0.9600 . ? 
C30 H30B 0.9600 . ? 
C30 H30C 0.9600 . ? 
C31 H31A 0.9600 . ? 
C31 H31B 0.9600 . ? 
C31 H31C 0.9600 . ? 
C32 C33 1.412(5) . ? 
C32 C34 1.521(5) . ? 
C32 H32 0.9800 . ? 
C33 H33A 0.9600 . ? 
C33 H33B 0.9600 . ? 
C33 H33C 0.9600 . ? 
C34 H34A 0.9600 . ? 
C34 H34B 0.9600 . ? 
C34 H34C 0.9600 . ? 
C35 C36 1.488(6) . ? 
C35 C43 1.562(7) . ? 
C35 H35 0.9800 . ? 
C36 C41 1.375(6) . ? 
C36 C37 1.399(6) . ? 
C37 C38 1.360(6) . ? 
C37 H37 0.9300 . ? 
C38 C39 1.367(7) . ? 
C38 H38 0.9300 . ? 
C39 C40 1.374(7) . ? 
C39 H39 0.9300 . ? 
C40 C41 1.377(7) . ? 
C40 H40 0.9300 . ? 
C41 H41 0.9300 . ? 
C42 C43 1.320(6) . ? 
C42 H42A 0.9300 . ? 
C42 H42B 0.9300 . ? 
C43 C44 1.395(8) . ? 
  
loop_ 
 _geom_angle_atom_site_label_1 
 _geom_angle_atom_site_label_2 
 _geom_angle_atom_site_label_3 
 _geom_angle 
 _geom_angle_site_symmetry_1 
 _geom_angle_site_symmetry_3 
 _geom_angle_publ_flag 
O1 P1 N1 115.37(17) . . ? 
O1 P1 N3 106.69(15) . . ? 
N1 P1 N3 113.90(17) . . ? 
O1 P1 N2 118.91(16) . . ? 
N1 P1 N2 94.27(18) . . ? 
N3 P1 N2 107.44(16) . . ? 
O2 P2 N5 114.37(19) . . ? 
O2 P2 N7 106.33(17) . . ? 
N5 P2 N7 113.16(18) . . ? 
O2 P2 N6 120.02(18) . . ? 
N5 P2 N6 94.67(19) . . ? 
N7 P2 N6 108.14(18) . . ? 
C2 N1 C7 119.0(3) . . ? 
C2 N1 P1 112.1(3) . . ? 
C7 N1 P1 125.8(3) . . ? 
C1 N2 C10 121.7(3) . . ? 
C1 N2 P1 109.9(3) . . ? 
C10 N2 P1 116.6(3) . . ? 
C13 N3 P1 125.0(2) . . ? 
C13 N3 H3 117.5 . . ? 
P1 N3 H3 117.5 . . ? 
C24 N5 C29 123.8(4) . . ? 
C24 N5 P2 112.4(3) . . ? 
C29 N5 P2 121.6(3) . . ? 
C23 N6 C32 114.7(4) . . ? 
C23 N6 P2 110.0(3) . . ? 
C32 N6 P2 121.1(3) . . ? 
C35 N7 P2 126.6(3) . . ? 
C35 N7 H7 116.7 . . ? 
P2 N7 H7 116.7 . . ? 
N2 C1 C6 119.1(4) . . ? 
N2 C1 C2 102.9(3) . . ? 
C6 C1 C2 110.6(4) . . ? 
N2 C1 H1 107.9 . . ? 
C6 C1 H1 107.9 . . ? 
C2 C1 H1 107.9 . . ? 
N1 C2 C1 104.9(4) . . ? 
N1 C2 C3 118.5(4) . . ? 
C1 C2 C3 110.2(3) . . ? 
N1 C2 H2 107.6 . . ? 
C1 C2 H2 107.6 . . ? 
C3 C2 H2 107.6 . . ? 
C4 C3 C2 108.0(4) . . ? 
C4 C3 H3A 110.1 . . ? 
C2 C3 H3A 110.1 . . ? 
C4 C3 H3B 110.1 . . ? 
C2 C3 H3B 110.1 . . ? 
H3A C3 H3B 108.4 . . ? 
C5 C4 C3 113.0(4) . . ? 
C5 C4 H4A 109.0 . . ? 
C3 C4 H4A 109.0 . . ? 
C5 C4 H4B 109.0 . . ? 
C3 C4 H4B 109.0 . . ? 
H4A C4 H4B 107.8 . . ? 
C4 C5 C6 112.9(4) . . ? 
C4 C5 H5A 109.0 . . ? 
C6 C5 H5A 109.0 . . ? 
C4 C5 H5B 109.0 . . ? 
C6 C5 H5B 109.0 . . ? 
H5A C5 H5B 107.8 . . ? 
C1 C6 C5 109.3(4) . . ? 
C1 C6 H6A 109.8 . . ? 
C5 C6 H6A 109.8 . . ? 
C1 C6 H6B 109.8 . . ? 
C5 C6 H6B 109.8 . . ? 
H6A C6 H6B 108.3 . . ? 
N1 C7 C9 111.9(4) . . ? 
N1 C7 C8 111.8(4) . . ? 
C9 C7 C8 111.9(4) . . ? 
N1 C7 H7A 107.0 . . ? 
C9 C7 H7A 107.0 . . ? 
C8 C7 H7A 107.0 . . ? 
C7 C8 H8A 109.5 . . ? 
C7 C8 H8B 109.5 . . ? 
H8A C8 H8B 109.5 . . ? 
C7 C8 H8C 109.5 . . ? 
H8A C8 H8C 109.5 . . ? 
H8B C8 H8C 109.5 . . ? 
C7 C9 H9A 109.5 . . ? 
C7 C9 H9B 109.5 . . ? 
H9A C9 H9B 109.5 . . ? 
C7 C9 H9C 109.5 . . ? 
H9A C9 H9C 109.5 . . ? 
H9B C9 H9C 109.5 . . ? 
N2 C10 C12 113.4(4) . . ? 
N2 C10 C11 111.1(4) . . ? 
C12 C10 C11 112.9(4) . . ? 
N2 C10 H10 106.2 . . ? 
C12 C10 H10 106.2 . . ? 
C11 C10 H10 106.2 . . ? 
C10 C11 H11A 109.5 . . ? 
C10 C11 H11B 109.5 . . ? 
H11A C11 H11B 109.5 . . ? 
C10 C11 H11C 109.5 . . ? 
H11A C11 H11C 109.5 . . ? 
H11B C11 H11C 109.5 . . ? 
C10 C12 H12A 109.5 . . ? 
C10 C12 H12B 109.5 . . ? 
H12A C12 H12B 109.5 . . ? 
C10 C12 H12C 109.5 . . ? 
H12A C12 H12C 109.5 . . ? 
H12B C12 H12C 109.5 . . ? 
N3 C13 C21 111.8(4) . . ? 
N3 C13 C14 113.2(4) . . ? 
C21 C13 C14 110.0(3) . . ? 
N3 C13 H13 107.2 . . ? 
C21 C13 H13 107.2 . . ? 
C14 C13 H13 107.2 . . ? 
C19 C14 C15 117.9(4) . . ? 
C19 C14 C13 121.0(4) . . ? 
C15 C14 C13 121.1(5) . . ? 
C14 C15 C16 122.0(6) . . ? 
C14 C15 H15 119.0 . . ? 
C16 C15 H15 119.0 . . ? 
C17 C16 C15 119.8(6) . . ? 
C17 C16 H16 120.1 . . ? 
C15 C16 H16 120.1 . . ? 
C16 C17 C18 120.0(6) . . ? 
C16 C17 H17 120.0 . . ? 
C18 C17 H17 120.0 . . ? 
C17 C18 C19 120.1(6) . . ? 
C17 C18 H18 119.9 . . ? 
C19 C18 H18 119.9 . . ? 
C14 C19 C18 120.2(5) . . ? 
C14 C19 H19 119.9 . . ? 
C18 C19 H19 119.9 . . ? 
C21 C20 H20A 120.0 . . ? 
C21 C20 H20B 120.0 . . ? 
H20A C20 H20B 120.0 . . ? 
C20 C21 C22 118.2(5) . . ? 
C20 C21 C13 126.0(5) . . ? 
C22 C21 C13 115.8(5) . . ? 
N4 C22 C21 176.6(8) . . ? 
N6 C23 C28 117.1(4) . . ? 
N6 C23 C24 104.3(3) . . ? 
C28 C23 C24 109.8(4) . . ? 
N6 C23 H23 108.4 . . ? 
C28 C23 H23 108.4 . . ? 
C24 C23 H23 108.4 . . ? 
N5 C24 C25 119.1(4) . . ? 
N5 C24 C23 103.8(4) . . ? 
C25 C24 C23 108.9(4) . . ? 
N5 C24 H24 108.2 . . ? 
C25 C24 H24 108.2 . . ? 
C23 C24 H24 108.2 . . ? 
C24 C25 C26 107.7(4) . . ? 
C24 C25 H25A 110.2 . . ? 
C26 C25 H25A 110.2 . . ? 
C24 C25 H25B 110.2 . . ? 
C26 C25 H25B 110.2 . . ? 
H25A C25 H25B 108.5 . . ? 
C27 C26 C25 113.1(5) . . ? 
C27 C26 H26A 109.0 . . ? 
C25 C26 H26A 109.0 . . ? 
C27 C26 H26B 109.0 . . ? 
C25 C26 H26B 109.0 . . ? 
H26A C26 H26B 107.8 . . ? 
C26 C27 C28 114.6(4) . . ? 
C26 C27 H27A 108.6 . . ? 
C28 C27 H27A 108.6 . . ? 
C26 C27 H27B 108.6 . . ? 
C28 C27 H27B 108.6 . . ? 
H27A C27 H27B 107.6 . . ? 
C23 C28 C27 108.3(4) . . ? 
C23 C28 H28A 110.0 . . ? 
C27 C28 H28A 110.0 . . ? 
C23 C28 H28B 110.0 . . ? 
C27 C28 H28B 110.0 . . ? 
H28A C28 H28B 108.4 . . ? 
C31 C29 N5 115.1(5) . . ? 
C31 C29 C30 120.3(5) . . ? 
N5 C29 C30 113.5(5) . . ? 
C31 C29 H29 101.2 . . ? 
N5 C29 H29 101.2 . . ? 
C30 C29 H29 101.2 . . ? 
C29 C30 H30A 109.5 . . ? 
C29 C30 H30B 109.5 . . ? 
H30A C30 H30B 109.5 . . ? 
C29 C30 H30C 109.5 . . ? 
H30A C30 H30C 109.5 . . ? 
H30B C30 H30C 109.5 . . ? 
C29 C31 H31A 109.5 . . ? 
C29 C31 H31B 109.5 . . ? 
H31A C31 H31B 109.5 . . ? 
C29 C31 H31C 109.5 . . ? 
H31A C31 H31C 109.5 . . ? 
H31B C31 H31C 109.5 . . ? 
C33 C32 N6 114.4(5) . . ? 
C33 C32 C34 113.8(5) . . ? 
N6 C32 C34 115.3(4) . . ? 
C33 C32 H32 103.8 . . ? 
N6 C32 H32 103.8 . . ? 
C34 C32 H32 103.8 . . ? 
C32 C33 H33A 109.5 . . ? 
C32 C33 H33B 109.5 . . ? 
H33A C33 H33B 109.5 . . ? 
C32 C33 H33C 109.5 . . ? 
H33A C33 H33C 109.5 . . ? 
H33B C33 H33C 109.5 . . ? 
C32 C34 H34A 109.5 . . ? 
C32 C34 H34B 109.5 . . ? 
H34A C34 H34B 109.5 . . ? 
C32 C34 H34C 109.5 . . ? 
H34A C34 H34C 109.5 . . ? 
H34B C34 H34C 109.5 . . ? 
N7 C35 C36 113.2(4) . . ? 
N7 C35 C43 110.3(4) . . ? 
C36 C35 C43 108.6(4) . . ? 
N7 C35 H35 108.2 . . ? 
C36 C35 H35 108.2 . . ? 
C43 C35 H35 108.2 . . ? 
C41 C36 C37 116.6(6) . . ? 
C41 C36 C35 121.9(6) . . ? 
C37 C36 C35 121.4(5) . . ? 
C38 C37 C36 120.8(6) . . ? 
C38 C37 H37 119.6 . . ? 
C36 C37 H37 119.6 . . ? 
C37 C38 C39 121.7(7) . . ? 
C37 C38 H38 119.2 . . ? 
C39 C38 H38 119.2 . . ? 
C38 C39 C40 118.7(7) . . ? 
C38 C39 H39 120.7 . . ? 
C40 C39 H39 120.7 . . ? 
C39 C40 C41 119.8(7) . . ? 
C39 C40 H40 120.1 . . ? 
C41 C40 H40 120.1 . . ? 
C36 C41 C40 122.4(6) . . ? 
C36 C41 H41 118.8 . . ? 
C40 C41 H41 118.8 . . ? 
C43 C42 H42A 120.0 . . ? 
C43 C42 H42B 120.0 . . ? 
H42A C42 H42B 120.0 . . ? 
C42 C43 C44 116.5(6) . . ? 
C42 C43 C35 128.2(6) . . ? 
C44 C43 C35 115.2(6) . . ? 
N8 C44 C43 172.7(10) . . ? 
  
loop_ 
 _geom_torsion_atom_site_label_1 
 _geom_torsion_atom_site_label_2 
 _geom_torsion_atom_site_label_3 
 _geom_torsion_atom_site_label_4 
 _geom_torsion 
 _geom_torsion_site_symmetry_1 
 _geom_torsion_site_symmetry_2 
 _geom_torsion_site_symmetry_3 
 _geom_torsion_site_symmetry_4 
 _geom_torsion_publ_flag 
O1 P1 N1 C2 -131.1(3) . . . . ? 
N3 P1 N1 C2 105.0(3) . . . . ? 
N2 P1 N1 C2 -6.2(3) . . . . ? 
O1 P1 N1 C7 69.1(4) . . . . ? 
N3 P1 N1 C7 -54.8(4) . . . . ? 
N2 P1 N1 C7 -166.1(3) . . . . ? 
O1 P1 N2 C1 102.8(3) . . . . ? 
N1 P1 N2 C1 -19.4(3) . . . . ? 
N3 P1 N2 C1 -136.1(3) . . . . ? 
O1 P1 N2 C10 -40.9(3) . . . . ? 
N1 P1 N2 C10 -163.1(3) . . . . ? 
N3 P1 N2 C10 80.2(3) . . . . ? 
O1 P1 N3 C13 166.6(3) . . . . ? 
N1 P1 N3 C13 -65.0(4) . . . . ? 
N2 P1 N3 C13 38.0(4) . . . . ? 
O2 P2 N5 C24 -134.9(3) . . . . ? 
N7 P2 N5 C24 103.1(3) . . . . ? 
N6 P2 N5 C24 -8.9(3) . . . . ? 
O2 P2 N5 C29 61.3(4) . . . . ? 
N7 P2 N5 C29 -60.7(4) . . . . ? 
N6 P2 N5 C29 -172.7(4) . . . . ? 
O2 P2 N6 C23 105.7(3) . . . . ? 
N5 P2 N6 C23 -16.0(3) . . . . ? 
N7 P2 N6 C23 -132.2(3) . . . . ? 
O2 P2 N6 C32 -31.9(4) . . . . ? 
N5 P2 N6 C32 -153.6(3) . . . . ? 
N7 P2 N6 C32 90.1(4) . . . . ? 
O2 P2 N7 C35 176.1(4) . . . . ? 
N5 P2 N7 C35 -57.5(5) . . . . ? 
N6 P2 N7 C35 46.0(5) . . . . ? 
C10 N2 C1 C6 -58.4(5) . . . . ? 
P1 N2 C1 C6 160.1(3) . . . . ? 
C10 N2 C1 C2 178.8(4) . . . . ? 
P1 N2 C1 C2 37.2(4) . . . . ? 
C7 N1 C2 C1 -170.1(3) . . . . ? 
P1 N1 C2 C1 28.6(4) . . . . ? 
C7 N1 C2 C3 -46.7(5) . . . . ? 
P1 N1 C2 C3 151.9(3) . . . . ? 
N2 C1 C2 N1 -39.9(4) . . . . ? 
C6 C1 C2 N1 -168.2(3) . . . . ? 
N2 C1 C2 C3 -168.5(4) . . . . ? 
C6 C1 C2 C3 63.2(5) . . . . ? 
N1 C2 C3 C4 179.8(4) . . . . ? 
C1 C2 C3 C4 -59.5(5) . . . . ? 
C2 C3 C4 C5 54.5(5) . . . . ? 
C3 C4 C5 C6 -52.6(6) . . . . ? 
N2 C1 C6 C5 -176.9(4) . . . . ? 
C2 C1 C6 C5 -57.9(5) . . . . ? 
C4 C5 C6 C1 52.6(6) . . . . ? 
C2 N1 C7 C9 173.1(3) . . . . ? 
P1 N1 C7 C9 -28.3(5) . . . . ? 
C2 N1 C7 C8 -60.5(4) . . . . ? 
P1 N1 C7 C8 98.0(4) . . . . ? 
C1 N2 C10 C12 79.8(5) . . . . ? 
P1 N2 C10 C12 -141.0(3) . . . . ? 
C1 N2 C10 C11 -48.7(5) . . . . ? 
P1 N2 C10 C11 90.5(4) . . . . ? 
P1 N3 C13 C21 -106.8(4) . . . . ? 
P1 N3 C13 C14 128.3(3) . . . . ? 
N3 C13 C14 C19 32.1(5) . . . . ? 
C21 C13 C14 C19 -93.7(5) . . . . ? 
N3 C13 C14 C15 -149.1(4) . . . . ? 
C21 C13 C14 C15 85.1(5) . . . . ? 
C19 C14 C15 C16 -2.3(7) . . . . ? 
C13 C14 C15 C16 178.8(5) . . . . ? 
C14 C15 C16 C17 2.4(9) . . . . ? 
C15 C16 C17 C18 -1.8(10) . . . . ? 
C16 C17 C18 C19 1.3(9) . . . . ? 
C15 C14 C19 C18 1.7(6) . . . . ? 
C13 C14 C19 C18 -179.5(4) . . . . ? 
C17 C18 C19 C14 -1.2(7) . . . . ? 
N3 C13 C21 C20 -20.6(6) . . . . ? 
C14 C13 C21 C20 106.0(5) . . . . ? 
N3 C13 C21 C22 161.0(4) . . . . ? 
C14 C13 C21 C22 -72.4(5) . . . . ? 
C20 C21 C22 N4 95(12) . . . . ? 
C13 C21 C22 N4 -86(12) . . . . ? 
C32 N6 C23 C28 -63.2(5) . . . . ? 
P2 N6 C23 C28 156.2(3) . . . . ? 
C32 N6 C23 C24 175.1(3) . . . . ? 
P2 N6 C23 C24 34.6(4) . . . . ? 
C29 N5 C24 C25 -45.8(6) . . . . ? 
P2 N5 C24 C25 150.8(4) . . . . ? 
C29 N5 C24 C23 -167.1(4) . . . . ? 
P2 N5 C24 C23 29.5(4) . . . . ? 
N6 C23 C24 N5 -38.7(4) . . . . ? 
C28 C23 C24 N5 -165.1(3) . . . . ? 
N6 C23 C24 C25 -166.7(4) . . . . ? 
C28 C23 C24 C25 67.0(5) . . . . ? 
N5 C24 C25 C26 -179.4(4) . . . . ? 
C23 C24 C25 C26 -60.7(5) . . . . ? 
C24 C25 C26 C27 52.8(6) . . . . ? 
C25 C26 C27 C28 -49.8(7) . . . . ? 
N6 C23 C28 C27 -178.5(4) . . . . ? 
C24 C23 C28 C27 -59.7(5) . . . . ? 
C26 C27 C28 C23 52.0(6) . . . . ? 
C24 N5 C29 C31 100.1(6) . . . . ? 
P2 N5 C29 C31 -97.9(5) . . . . ? 
C24 N5 C29 C30 -44.1(6) . . . . ? 
P2 N5 C29 C30 117.9(5) . . . . ? 
C23 N6 C32 C33 165.8(5) . . . . ? 
P2 N6 C32 C33 -58.4(6) . . . . ? 
C23 N6 C32 C34 -59.5(5) . . . . ? 
P2 N6 C32 C34 76.3(5) . . . . ? 
P2 N7 C35 C36 114.9(4) . . . . ? 
P2 N7 C35 C43 -123.1(4) . . . . ? 
N7 C35 C36 C41 -135.6(5) . . . . ? 
C43 C35 C36 C41 101.5(6) . . . . ? 
N7 C35 C36 C37 46.3(6) . . . . ? 
C43 C35 C36 C37 -76.6(6) . . . . ? 
C41 C36 C37 C38 2.7(8) . . . . ? 
C35 C36 C37 C38 -179.1(5) . . . . ? 
C36 C37 C38 C39 -3.1(9) . . . . ? 
C37 C38 C39 C40 1.4(10) . . . . ? 
C38 C39 C40 C41 0.4(10) . . . . ? 
C37 C36 C41 C40 -0.9(9) . . . . ? 
C35 C36 C41 C40 -179.1(5) . . . . ? 
C39 C40 C41 C36 -0.7(10) . . . . ? 
N7 C35 C43 C42 -22.3(9) . . . . ? 
C36 C35 C43 C42 102.3(7) . . . . ? 
N7 C35 C43 C44 160.3(5) . . . . ? 
C36 C35 C43 C44 -75.0(7) . . . . ? 
C42 C43 C44 N8 -26(7) . . . . ? 
C35 C43 C44 N8 152(7) . . . . ? 
  
_diffrn_measured_fraction_theta_max    0.999 
_diffrn_reflns_theta_full              25.02 
_diffrn_measured_fraction_theta_full   0.999 
_refine_diff_density_max    0.202 
_refine_diff_density_min   -0.137 
_refine_diff_density_rms    0.030 
